# Supplementary material for: High glucose–induced Smad3 linker phosphorylation and CCN2 expression are inhibited by dapagliflozin in a diabetic tubule epithelial cell model
Source: PubMed Central journal article supplement (PMC8220447; doi:10.1042/bsr20203947), 2021-06-21
Supplement: BSR-2020-3947_supp.pdf [file BSR-2020-3947_supp.pdf]

**Figure 1A**  
**uncropped**  
**blot**

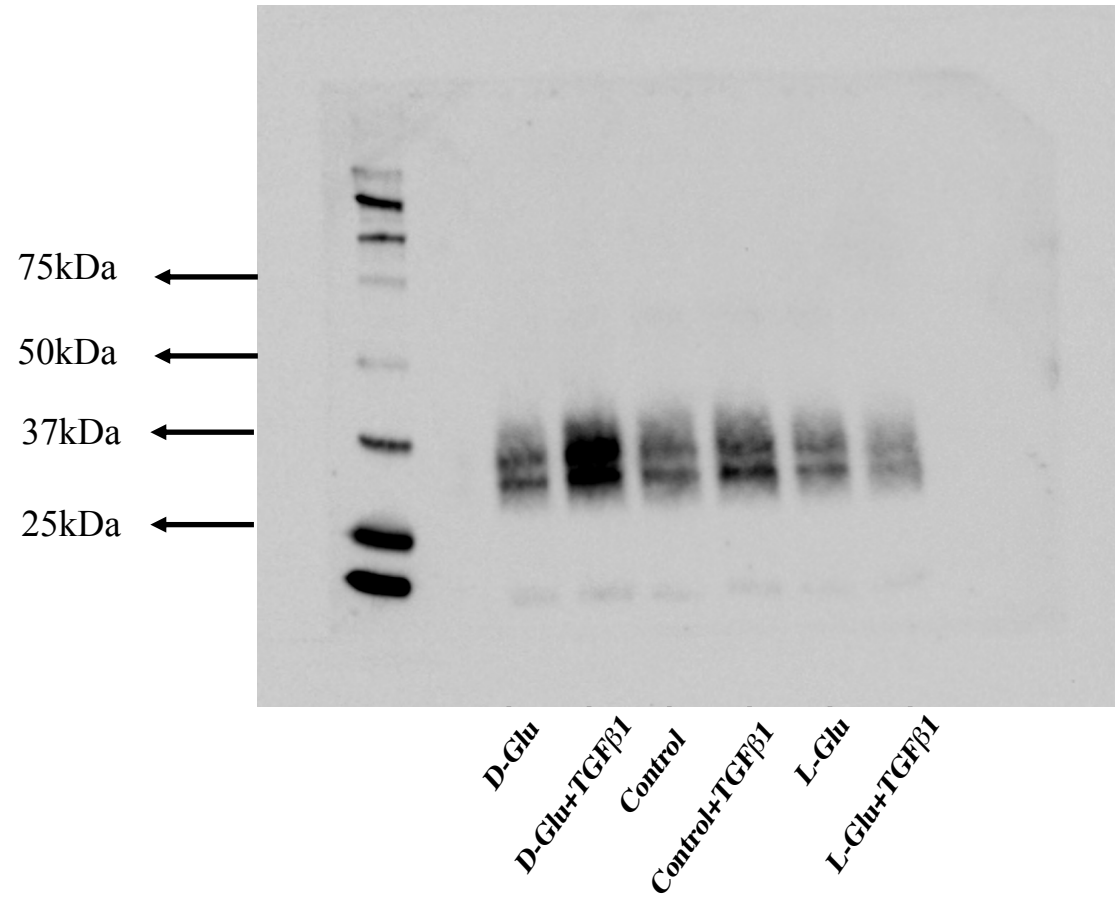

**S. Figure 1**  
**uncropped blot**

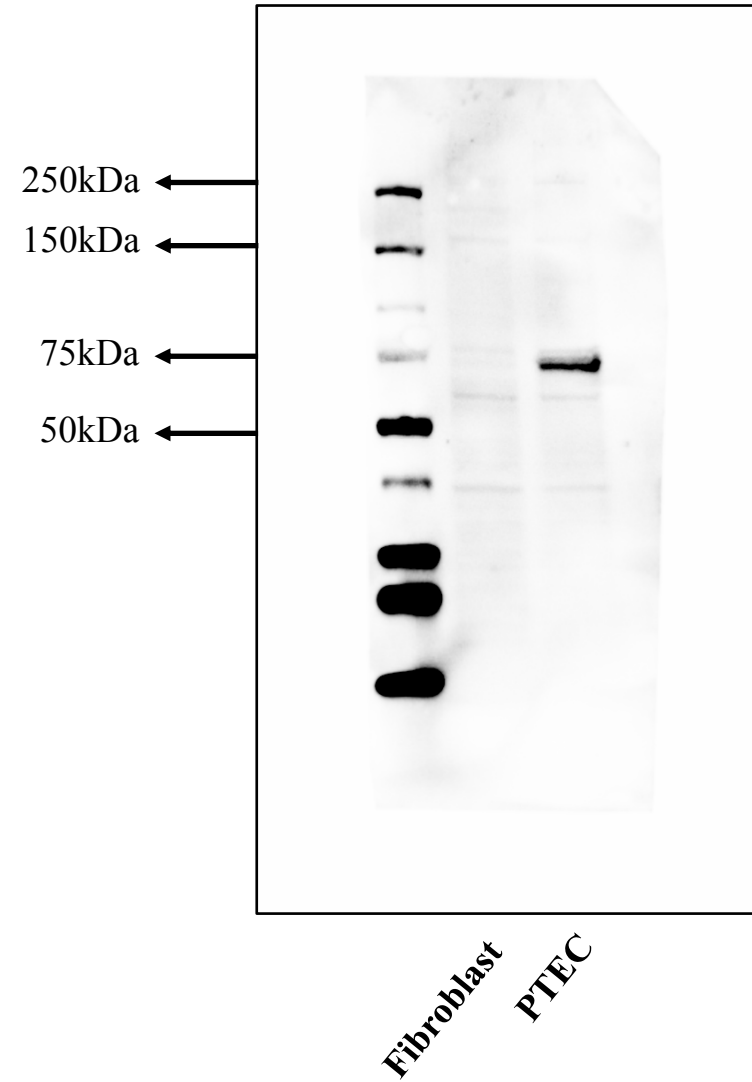

***Supplemental Figure 1: Representative SGLT2 western blot image after running basal human primary PTECS alongside a negative control.***

There was no expression of SGLT2 expression in the fibroblasts under our specific conditions.

**Figure 2A**  
**uncropped blot**

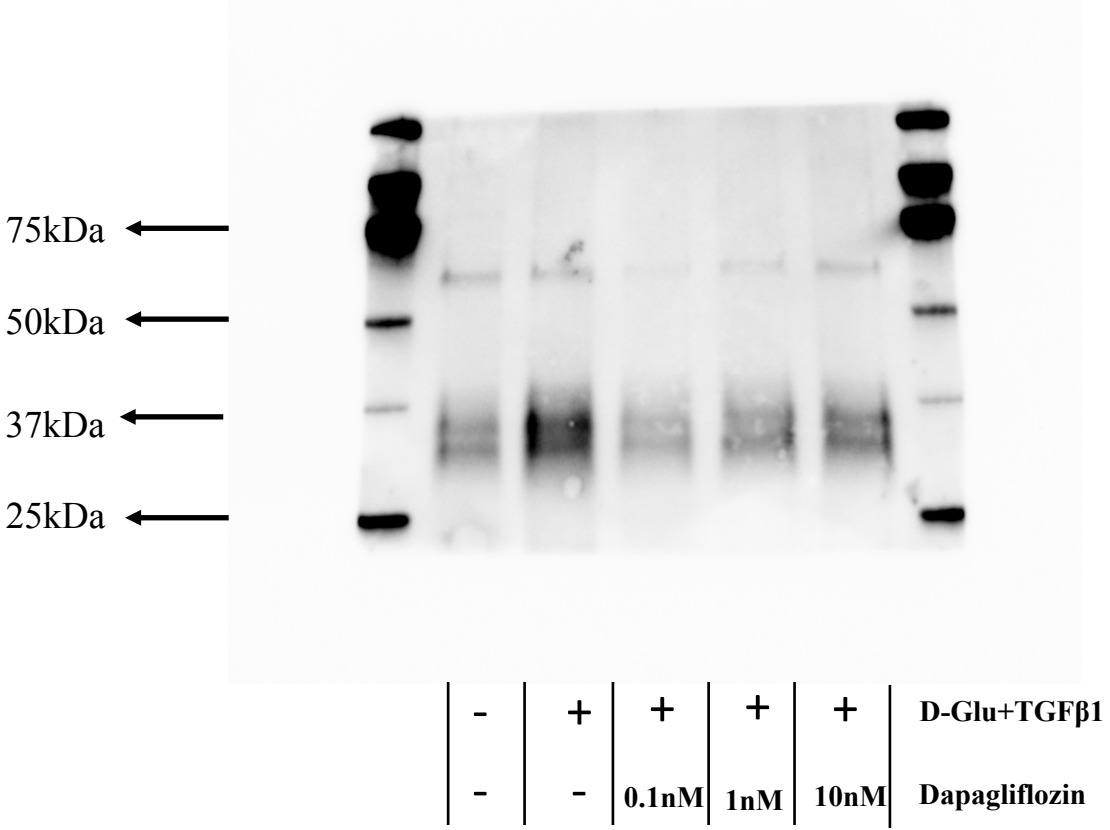



***Supplemental Figure 2: Individual donor responses to Dapagliflozin (dapa) treatment.***

As expected, each donor had a slight variation in response to the drug, but the overall response trend remained the same.

**Figure 3A**  
**uncropped blot**

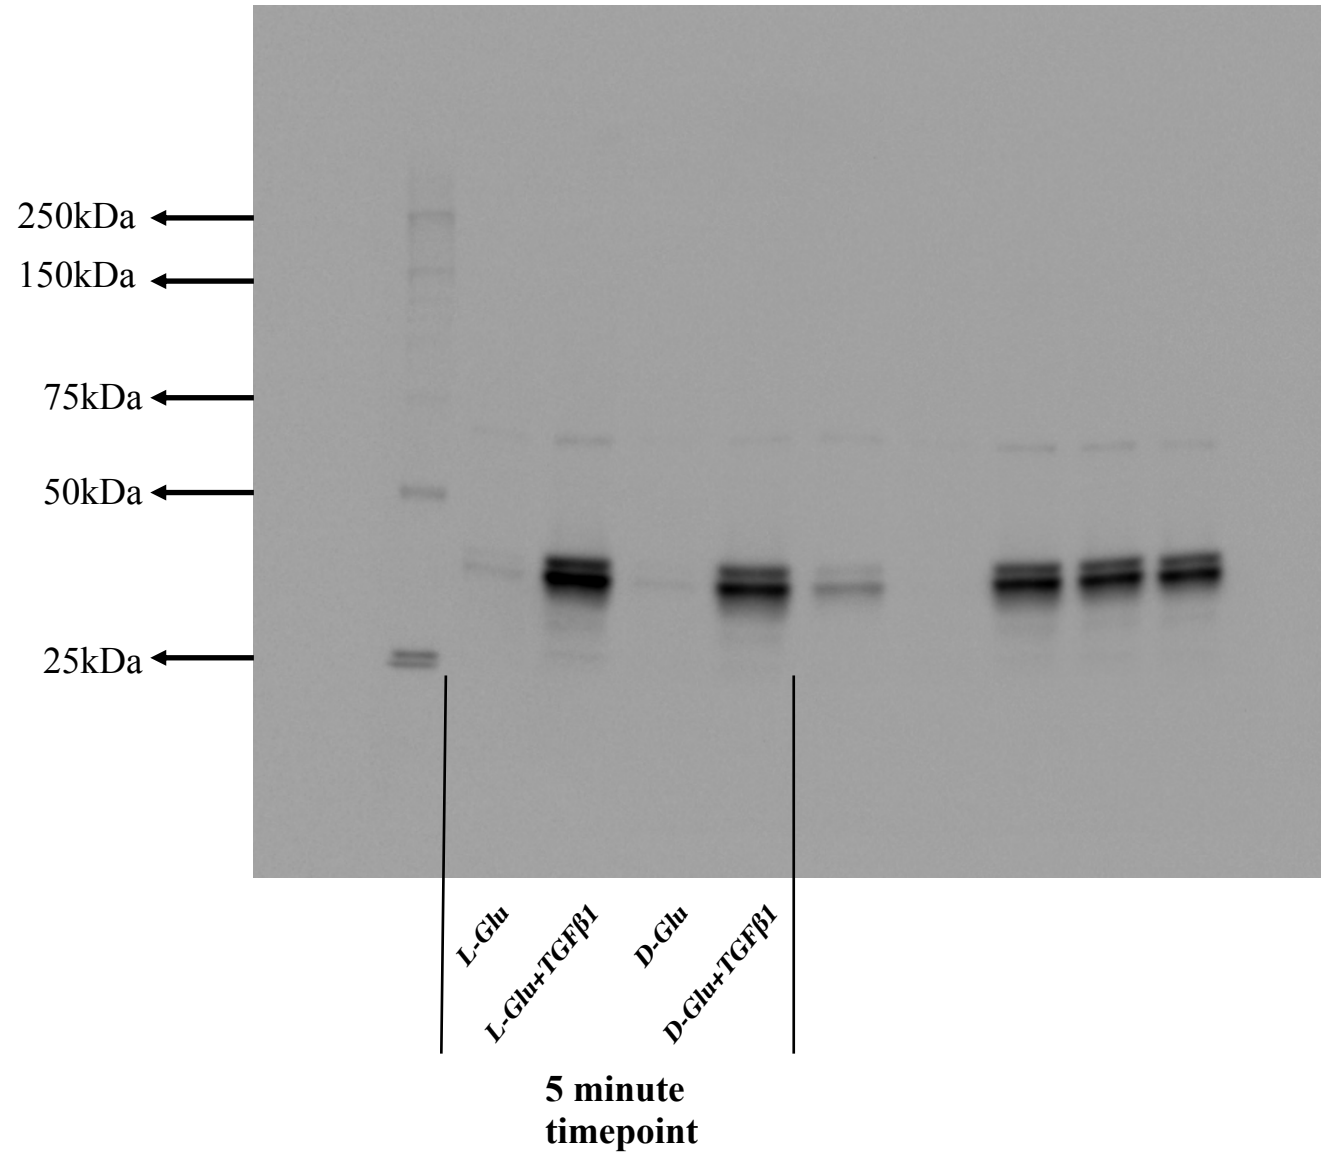

**Figure 3B**  
**uncropped blot**

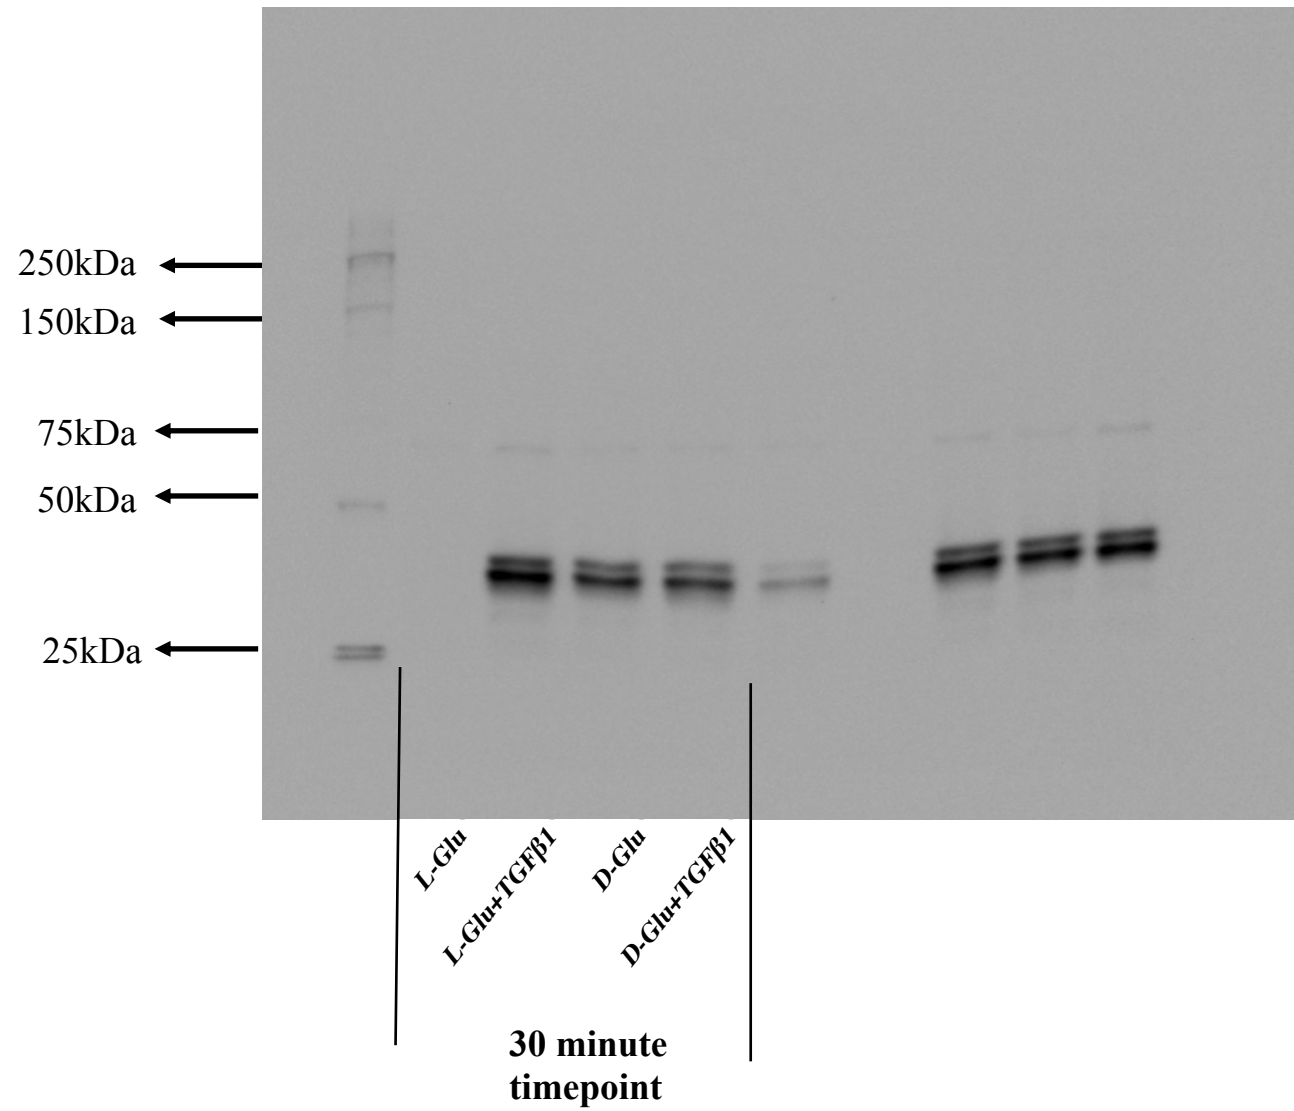

**Figure 3C**  
**uncropped blot**

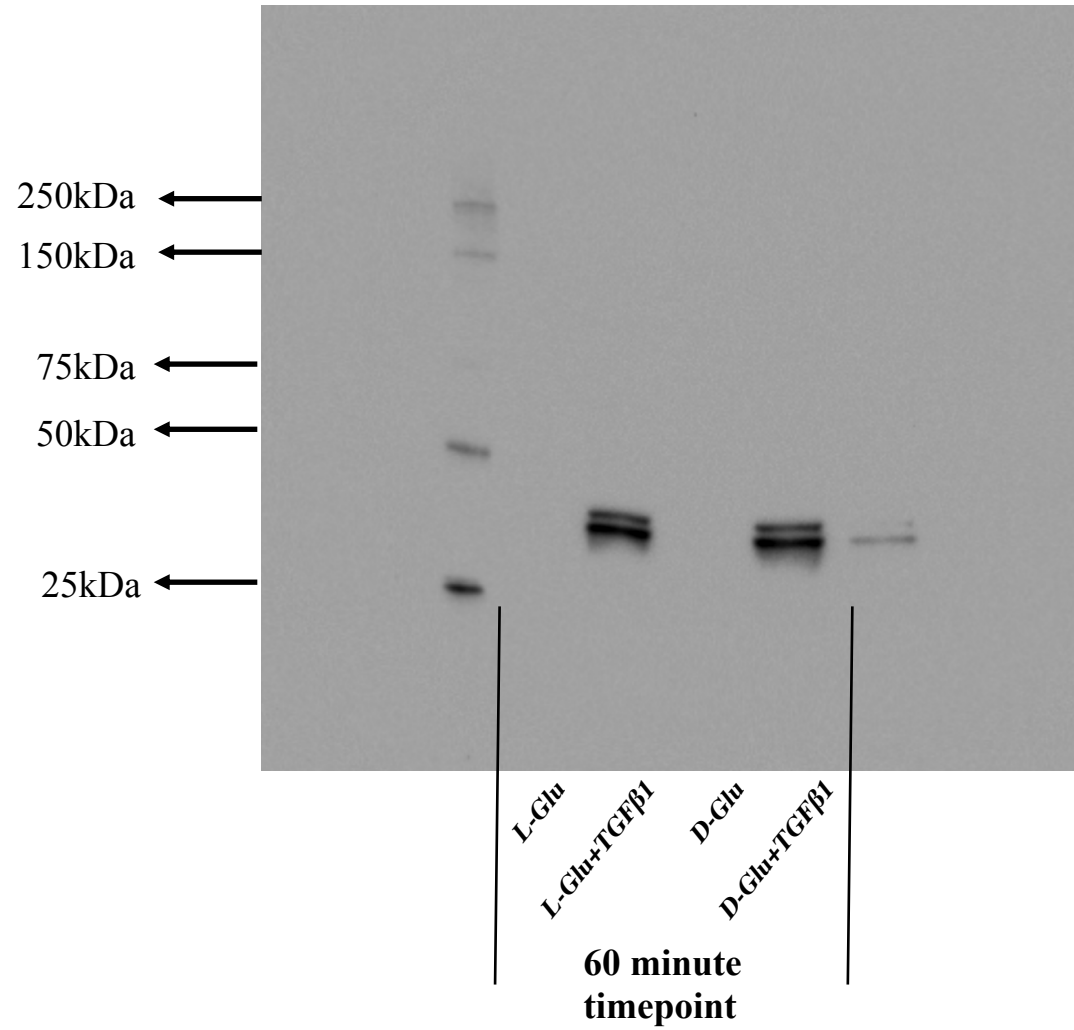

**Figure 3G**  
**uncropped blot**

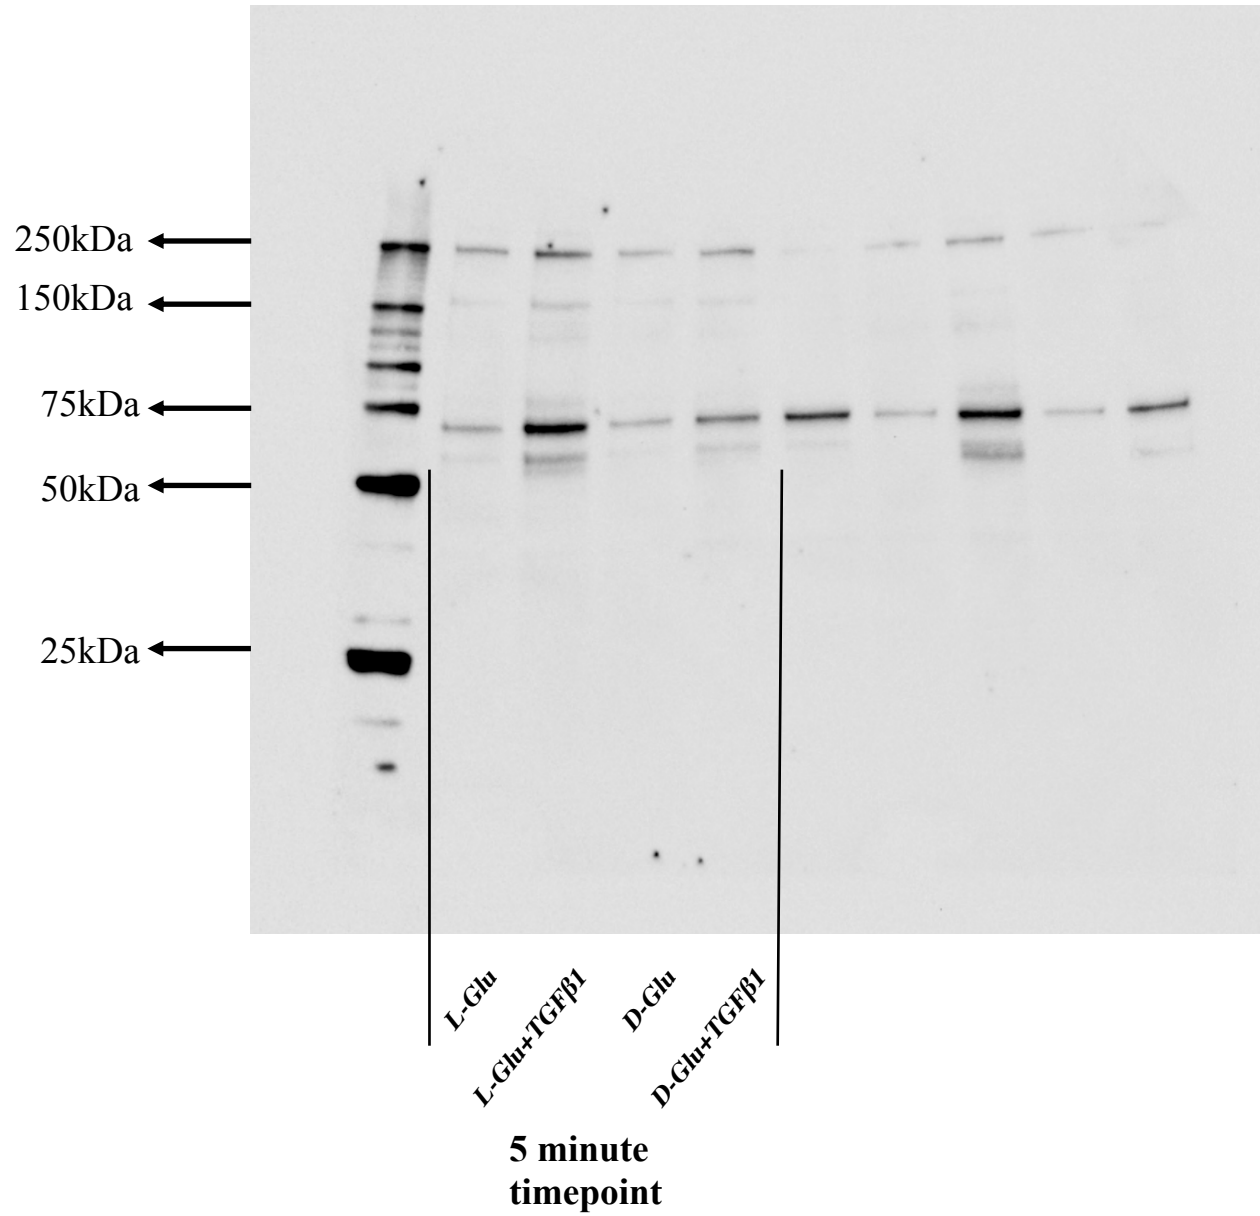

**Figure 3H**  
**uncropped blot**

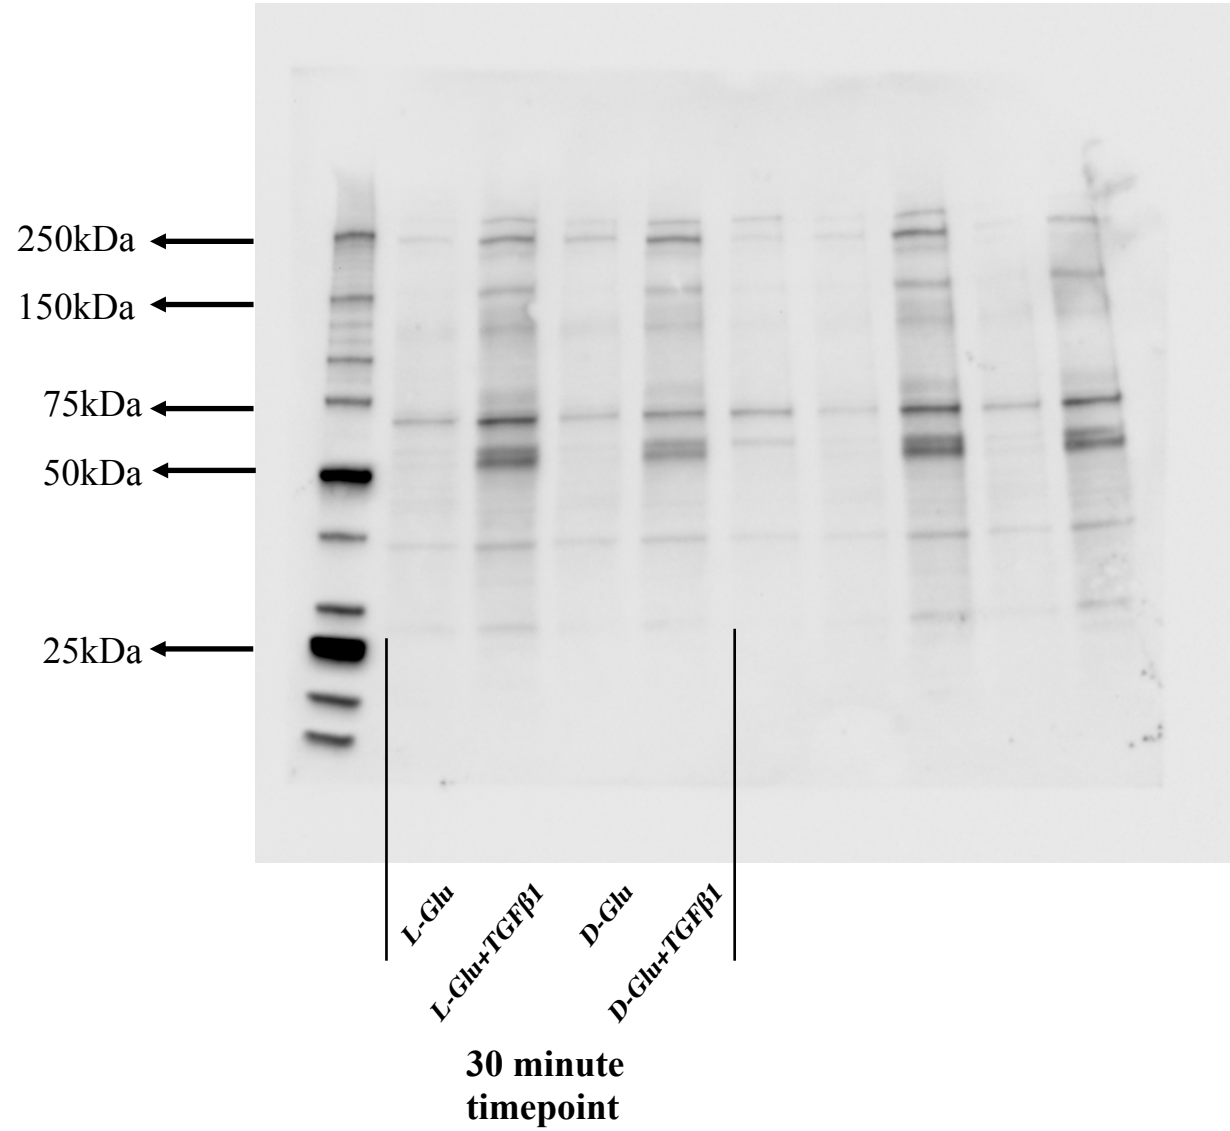

**Figure 3I**  
**uncropped blot**

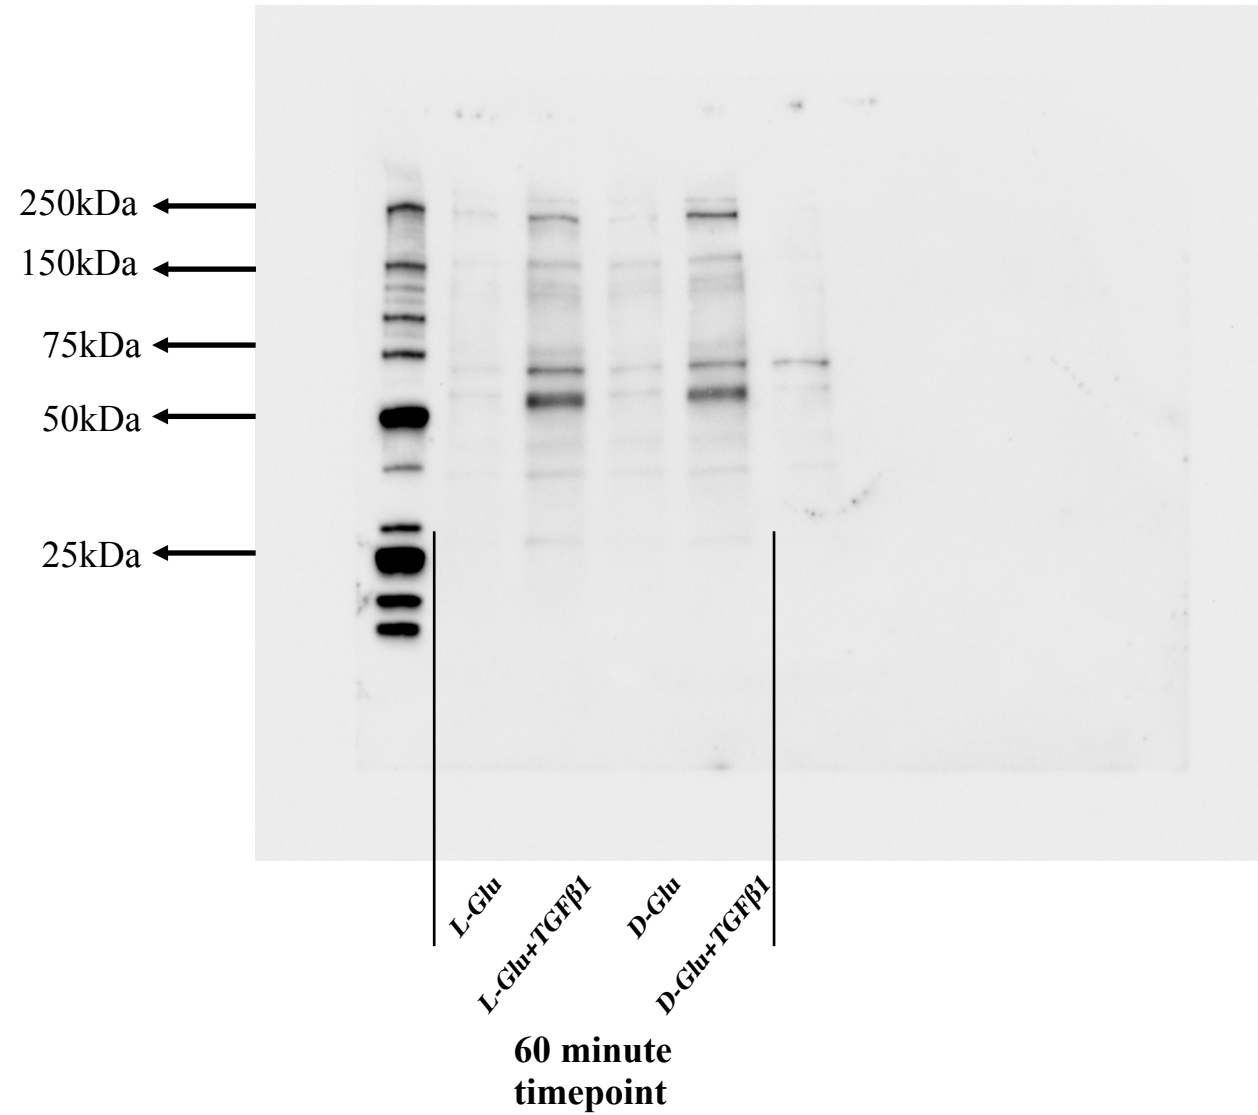

**Figure 3M**  
**uncropped blot**

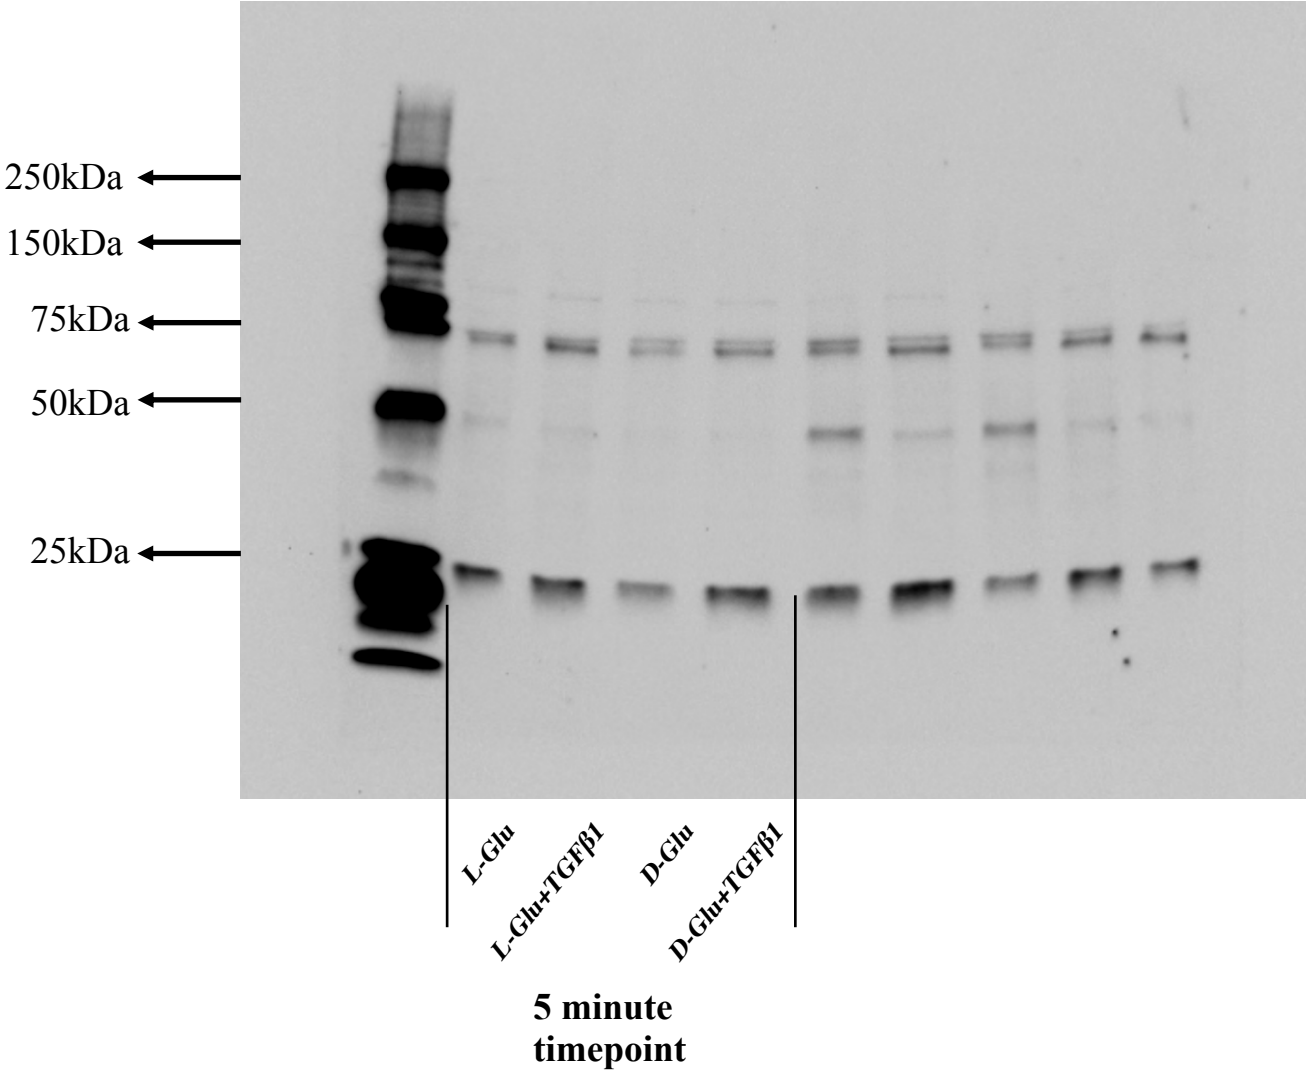



**Figure 3N**  
**uncropped blot**

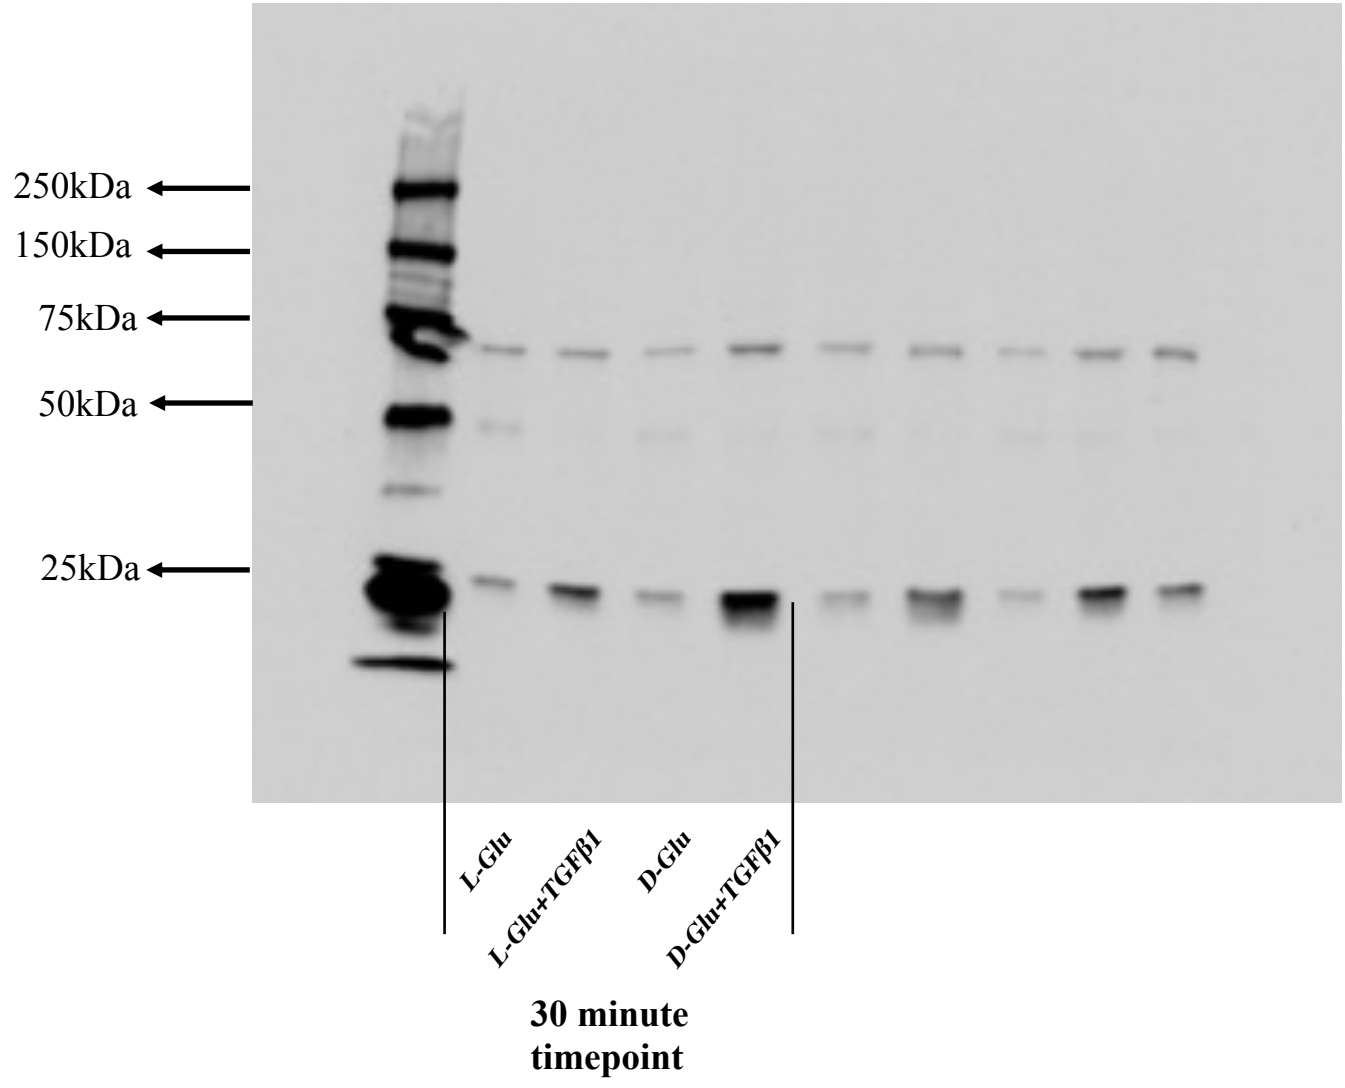

**Figure 3O**  
**uncropped blot**

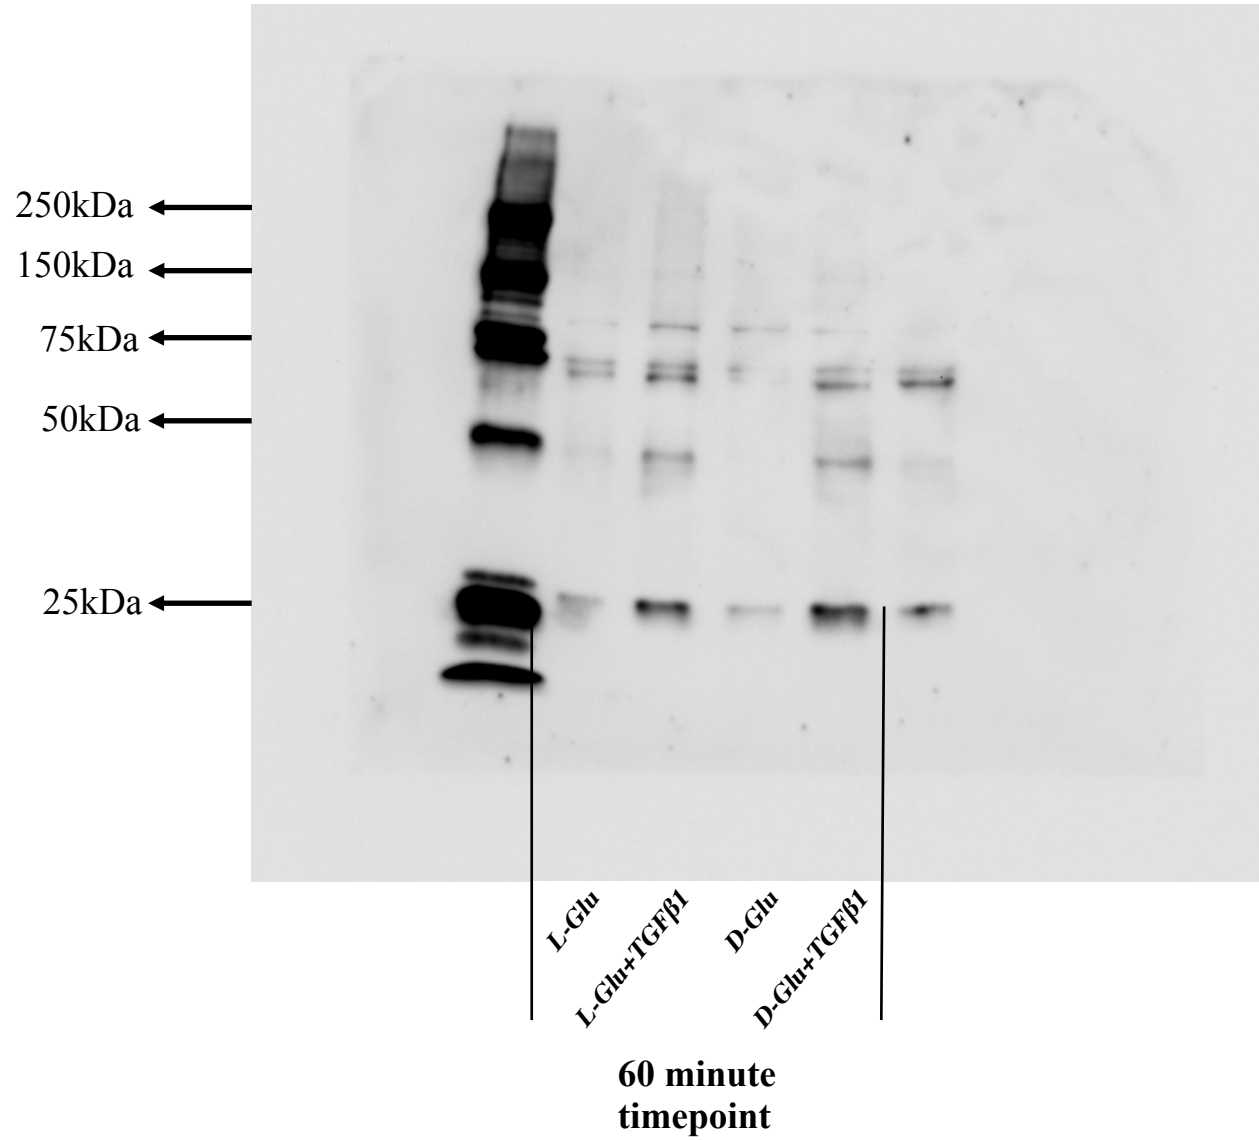

**S. Figure 3**  
**uncropped blot**

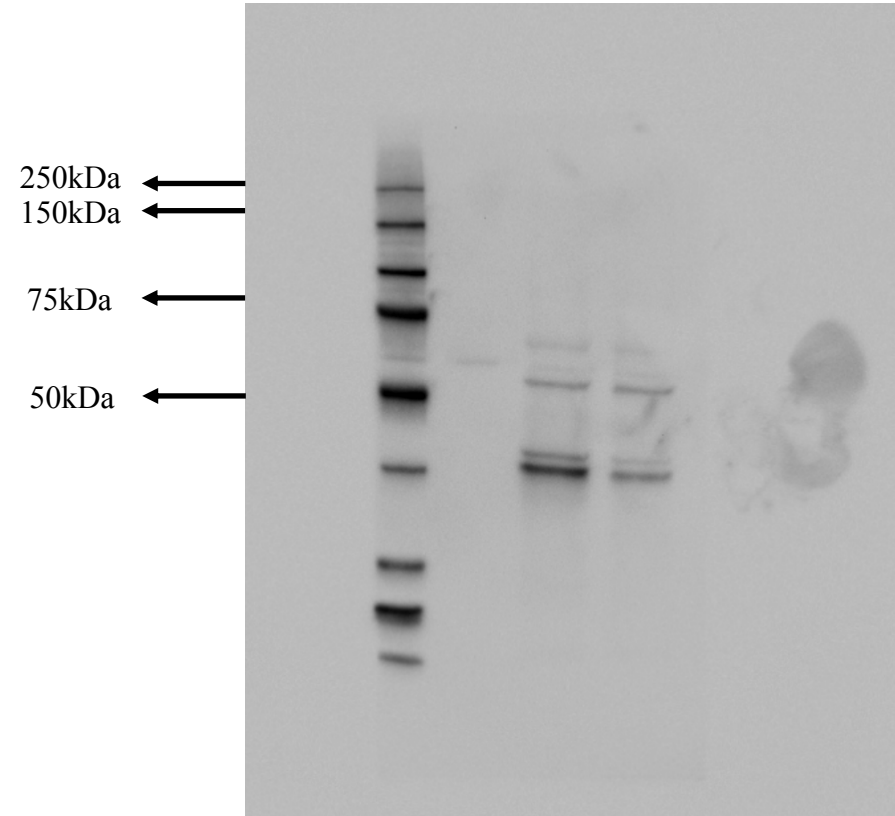

**D-Glu+TGF $\beta$ 1**  
**D-Glu+TGF $\beta$ 1+U0126 10 $\mu$ M**

***Supplemental Figure 3: Representative Phospho-ERK western blot after running PTECs treated with high glucose and TGF $\beta$ 1, with/without U0126 MEK inhibitor at 10 $\mu$ M.***

Confirmation of significant phospho-ERK knockdown by U0126 MEK inhibitor.

**Figure 4A**  
**uncropped blot**

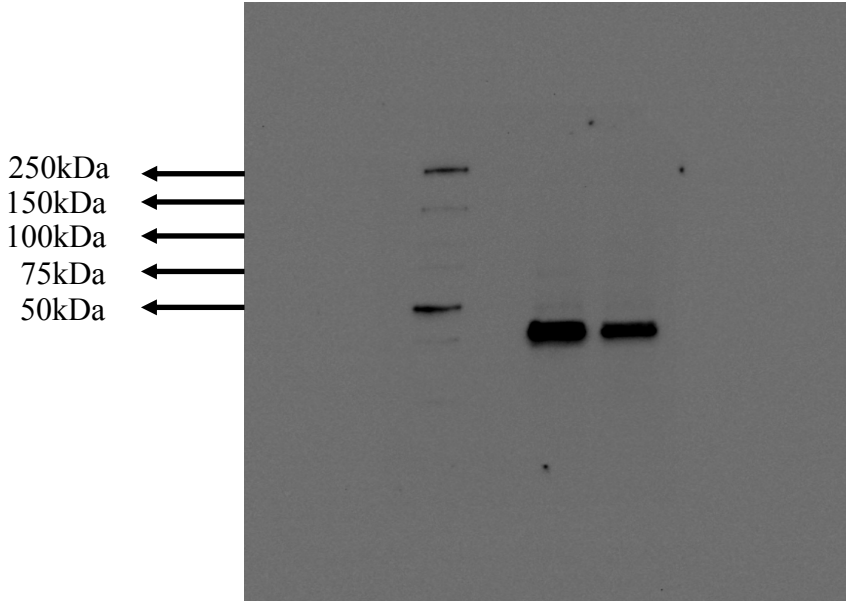

*D-Glu+TGFβ1*  
*D-Glu+TGFβ1+dapa 1mM*

**Figure 4C**  
**uncropped blot**

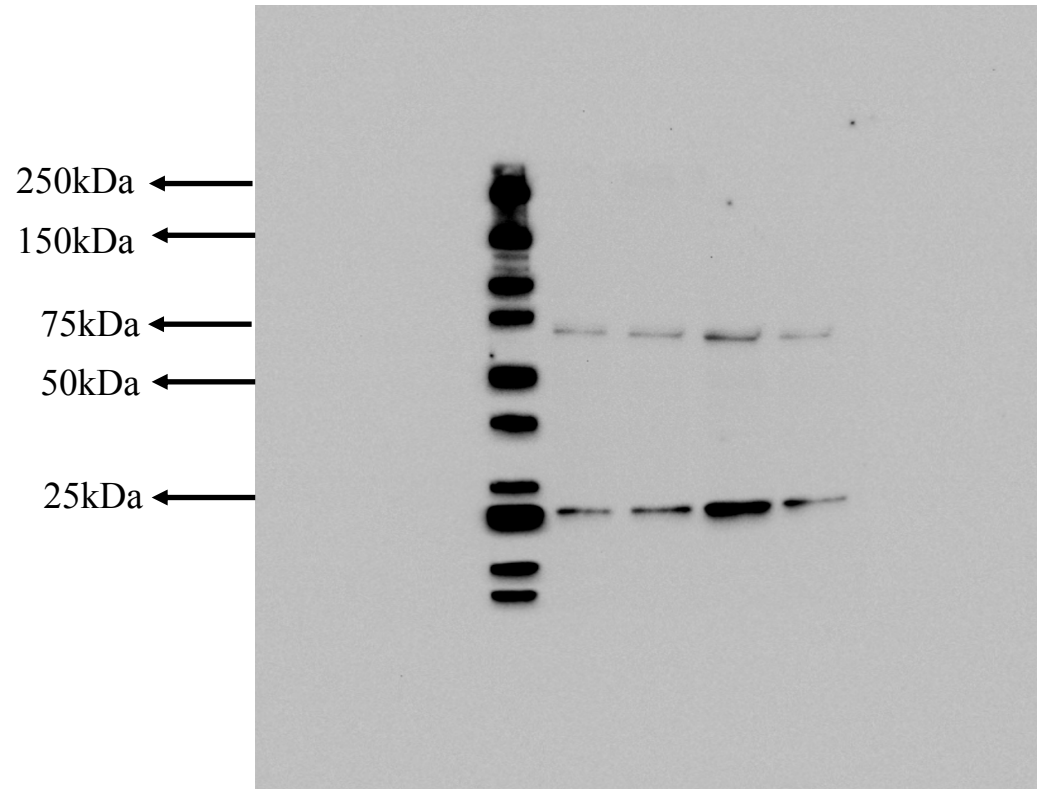

L-Glu+TGF $\beta$ 1  
L-Glu+TGF $\beta$ 1+dapa 1nM  
D-Glu+TGF $\beta$ 1  
D-Glu+TGF $\beta$ 1+dapa 1nM

**Figure 4E**  
**uncropped blot**

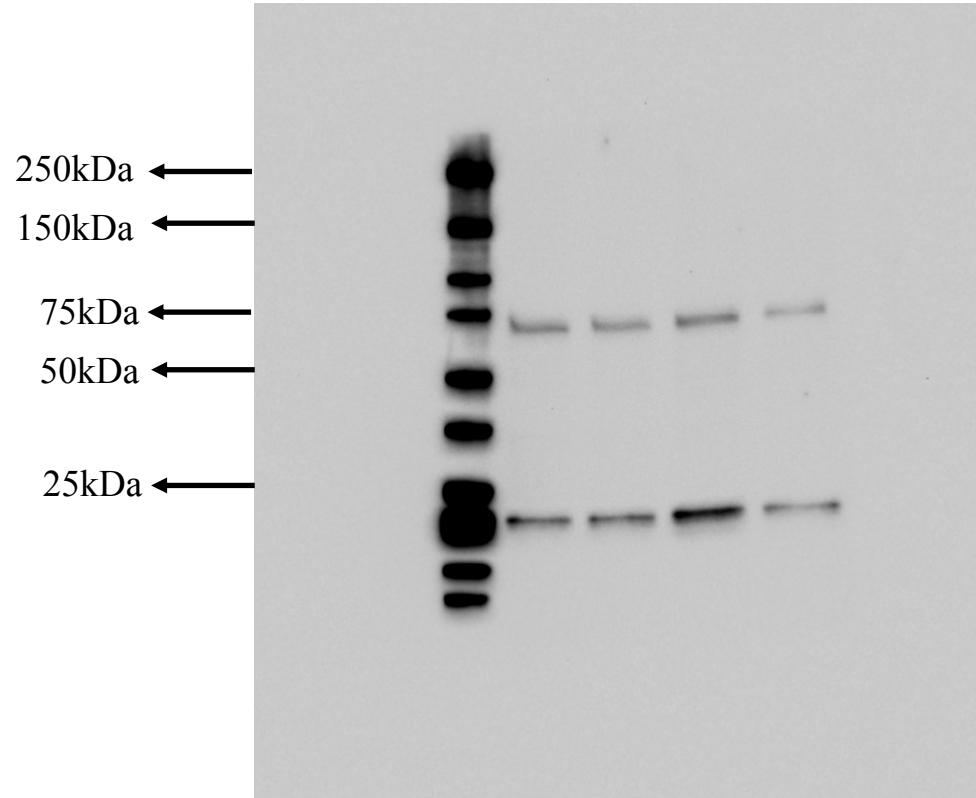

L-Glu+TGFβ1  
L-Glu+TGFβ1+U0126 10uM  
D-Glu+TGFβ1  
D-Glu+TGFβ1+U0126 10uM

**S. Figure 4E**  
**uncropped blot**

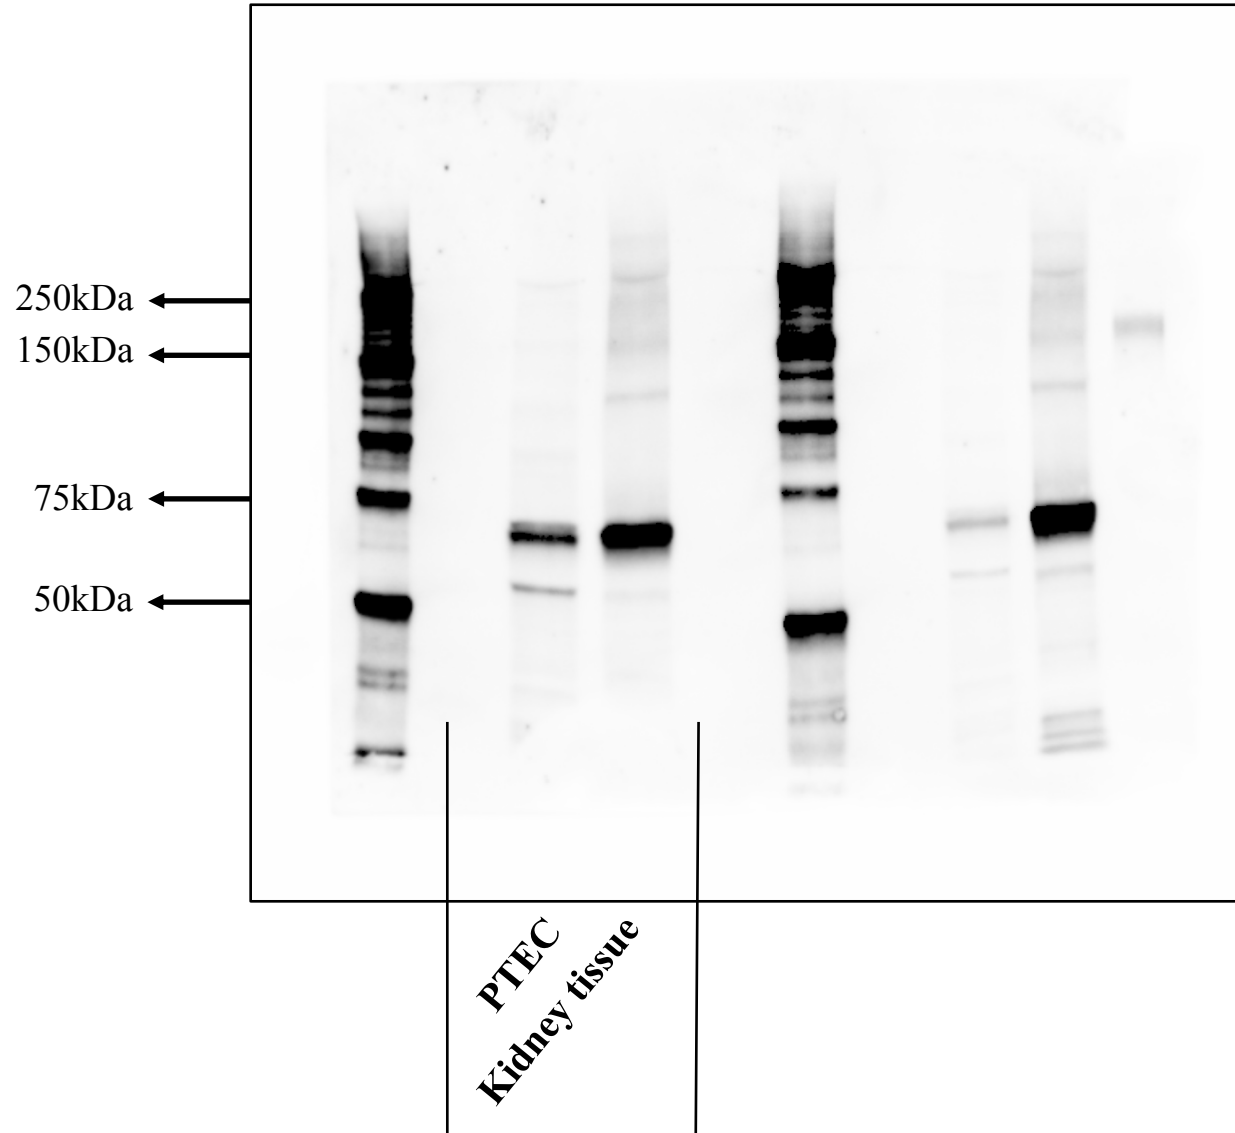



***Supplemental Figure 4: Microscopic Image and Gamma GT staining of PTECs***

(A) L-Glu and (B) 24 h D-Glu+TGF $\beta$ -1 treated PTECs were captured on the microscope (A & B with green filter) to compare any structural changes between the two treatments. (C) L-Glu and (D) D-Glu+TGF- $\beta$ 1 treated cells were also stained with gamma GT to check for positive brush border membrane activity. Distinct orange-red staining is clear in both treatments (E) The SGLT2 antibody used was able to detect an immunoreactive band at the expected weights in both cell lysate and tissue.
